# Supplementary material
Source: publisher figshare collection journal article supplement (https://diabetesjournals.figshare.com/articles/dataset/_/24250429)

# Supplementary Appendix

Longitudinal effects of glucose-lowering medications on  $\beta$ -cell function and insulin sensitivity in GRADE

Neda Rasouli, Naji Younes, Alokandanda Ghosh, Jeanine Albu, Robert M. Cohen, Ralph A. DeFronzo, Elsa Diaz, Laure Sayyed Kassem, José A. Luchsinger, Janet B. McGill, William I. Sivitz, William V. Tamborlane, Kristina M. Utzschneider, Steven E. Kahn, and the GRADE Research Group

## Table of Contents

|                                                                                                                                                                              |    |
|------------------------------------------------------------------------------------------------------------------------------------------------------------------------------|----|
| GRADE Research Group Listing .....                                                                                                                                           | 2  |
| Supplemental Figure 1: CONSORT Diagram .....                                                                                                                                 | 6  |
| Supplemental Figure 1: CONSORT Diagram .....                                                                                                                                 | 6  |
| Supplemental Table 1: HbA1c levels (%) in the different treatment groups .....                                                                                               | 7  |
| Supplemental Table 2: Glucose levels (mg/dL) in the different treatment groups .....                                                                                         | 8  |
| Supplemental Table 3: C-peptide levels (nmol/L) during the OGTT in the different treatment groups .....                                                                      | 9  |
| Supplemental Table 4: HOMA2-%S in the different treatment groups .....                                                                                                       | 10 |
| Supplemental Table 5: HOMA2-%B in the different treatment groups .....                                                                                                       | 11 |
| Supplemental Table 6: C-peptide index in the different treatment groups .....                                                                                                | 12 |
| Supplemental Table 7: Total C-peptide index in the different treatment groups .....                                                                                          | 13 |
| Supplemental Figure 2: Effects of the four different glucose-lowering medications on HOMA2-%B in participants on their assigned dual therapy .....                           | 14 |
| Panel A: Year 1 .....                                                                                                                                                        | 14 |
| Panel B: Year 3 .....                                                                                                                                                        | 14 |
| Panel C: Year 5 .....                                                                                                                                                        | 14 |
| Supplemental Figure 3: Effects of the four different glucose-lowering medications on CPI in participants on their originally assigned dual therapy .....                     | 15 |
| Panel A: Year 1 .....                                                                                                                                                        | 15 |
| Panel B: Year 3 .....                                                                                                                                                        | 15 |
| Panel C: Year 5 .....                                                                                                                                                        | 15 |
| Supplemental Figure 4: Effects of the four different glucose-lowering medications on total C-peptide response in participants on their originally assigned dual therapy..... | 16 |
| Panel A: Year 1 .....                                                                                                                                                        | 16 |
| Panel B: Year 3 .....                                                                                                                                                        | 16 |
| Panel C: Year 5 .....                                                                                                                                                        | 16 |



## GRADE Research Group (April 30, 2021)

**Designations:** Principal Investigator (PI); Co-Principal Investigator (Co-PI); Co-Investigator (Co-I); Study Coordinator (SC); Recruitment/Retention Coordinator (RC); Research Staff (RS)

### Current Clinical Centers

**Albert Einstein College of Medicine:** Crandall, JP (PI); McKee, MD (Co-PI, past); Behringer-Massera, S (Co-I, past); Brown-Friday, J (SC); Xhori, E (RC, past); Ballentine-Cargill, K (RS); Duran, S (RS); Estrella, H (RS); Gonzalez de la torre, S (RS, past); Lukin, J (RS, past)

**Atlanta VA Medical Center:** Phillips, LS (PI); Burgess, E (Co-I); Olson, D (Co-I); Rhee, M (Co-I); Wilson, P (Co-I); Raines, TS (SC); Boers, J (SC); Costello, J (SC); Maher-Albertelli, M (SC); Mungara, R (SC); Savoye, L (SC, past); White, CA (SC); Gullett, C (SC, past); Holloway, L (SC, past); Morehead, F (SC, past); Person, S (SC, past); Sibymon, M (SC, past); Tanukonda, S (SC, past); Adams, C (RC, past); Ross, A (RC, past)

**Baylor College of Medicine:** Balasubramanyam, A (PI); Gaba, R (Co-I); Gonzalez Hattery, E (SC); Ideozu, A (SC); Jimenez, J (SC); Montes, G (RC); Wright, C (RS, past)

**Baylor Scott & White Research Institute (Baylor Research Institute):** Hollander, P (PI); Roe, E (Co-I, past); Jackson, A (SC); Smiley, A (SC); Burt, P (SC, past); Estrada, L (RS); Chionh, K (RS, past)

**Case Western Reserve University/Cleveland VA/MetroHealth Medical Center:** Ismail-Beigi, F (PI); Falck-Ytter, C (Co-PI); Sayyed Kassem, L (Co-PI); Sood, A (Co-PI, past); Tiktin, M (Co-I, SC); Kulow, T (SC); Newman, C (SC); Stancil, KA (SC); Cramer, B (SC, past); Iacoboni, J (SC, past); Kononets, MV (SC, past); Sanders, C (SC, past); Tucker, L (SC, past); Werner, A (SC, past); Maxwell, A (RS); McPhee, G (RS); Patel, C (RS); Colosimo, L (RS, past); Krol, A (RS, past)

**Columbia University Medical Center:** Goland, R (PI); Pring, J (SC); Alfano, L (SC); Kringas, P (SC, past); Hausheer, C (RC, past); Tejada, J (RC, past); Gumpel, K (RS, past); Kirpitch, A (RS, past); Schneier, H (RS, past)

**Duke University Medical Center:** Green, JB (PI); AbouAssi, H (Co-I); Chatterjee, R (Co-I); Feinglos, MN (Co-I, past); English Jones, J (SC, RC); Khan, SA (SC, RC); Kimpel, JB (SC, past); Zimmer, RP (SC, past); Furst, M (RC, past); Satterwhite, BM (RS); Thacker, CR (RS); Evans Kreider, K (RS, past)

**Indiana University:** Mariash, CN (PI); Mather, KJ (PI, past); Ismail, HM (Co-I); Lteif, A (Co-I, past); Mullen, M (SC); Hamilton, T (SC, past); Patel, N (SC, past); Riera, G (RC); Jackson, M (RC, past); Pirics, V (RC, past); Aguillar, D (RS, past); Howard, D (RS, past); Hurt, S (RS, past)

**International Diabetes Center:** Bergenstal, R (PI); Carlson, A (Co-I); Martens, T (Co-I); Johnson, M (SC); Hill, R (SC); Hyatt, J (SC); Jensen, C (SC); Madden, M (SC); Martin, D (SC); Willis, H (SC); Konerza, W (RS); Yang, S (RS); Kleeberger, K (RS, past); Passi, R (RS, past)

**Kaiser Permanente Northwest:** Fortmann, S (PI); Herson, M (Co-I); Mularski, K (Co-I); Glauber, H (Co-I, past); Prihoda, J (Co-I, past); Ash, B (SC); Carlson, C (SC); Ramey, PA (SC); Schield, E (SC); Torgrimson-Ojerio, B (SC); Arnold, K (SC, past); Kauffman, B (SC, past); Panos, E (SC, past); Sahnow, S (RC); Bays, K (RS); Berame, K (RS); Cook, J (RS); Ghioni, D (RS); Gluth, J (RS); Schell, K (RS); Criscola, J (RS, past); Friason, C (RS, past); Jones, S (RS, past); Nazarov, S (RS, past)

**Kaiser Permanente of Georgia:** Barzilay, J (PI); Rassouli, N (Co-PI); Puttnam, R (Co-I); Ojoawo, B (SC); Nelson, R (RC); Curtis, M (SC, past); Hollis, B (SC, past); Sanders-Jones, C (SC, past); Stokes, K (SC, past); El-Haqq, Z (RS, past); Kolli, A (RS, past); Tran, T (RS, past)

**Massachusetts General Hospital:** Wexler, D (PI); Larkin, ME (Co-I, SC); Meigs, J (Co-I); Chambers, B (SC, past); Dushkin, A (SC, past); Rocchio, G (SC, past); Yepes, M (SC, past); Steiner, B (RC); Dulin, H (RC, past); Cayford, M (RS); Chu, K (RS); DeManbey, A (RS); Hillard, M (RS); Martin, K (RS); Thangthaeng, N (RS); Gurry, L (RS, past); Kochis, R (RS, past); Raymond, E (RS, past); Ripley, V (RS, past); Stevens, C (RS, past)

**MedStar Health Research Institute/ MedStar Baltimore:** Park, J (PI); Aroda, V (PI, past); Ghazi, A (Co-PI); Magee, M (Co-I); Rensing, Ann (Co-I); Loveland, A (SC); Hamm, M (SC); Hurtado, M (SC); Kuhn, A (SC); Leger, J (SC); Manandhar, L (SC); Mwicigi, F (SC); Sanchez, O (SC); Young, T (SC)

**Miami VA Healthcare System/University of Miami:** Garg, R (PI); Lagari-Libhaber, V (PI); Florez, HJ (PI, past); Valencia, WM (PI, past); Marks, J (Co-PI, past); Casula, S (Co-I); Oropesa-Gonzalez, L (SC); Hue, L (SC, past); Cuadot, A (SC, past); Nieto-Martinez, R (SC, past); Riccio Veliz, AK (SC,



past); Gutt, M (RC, past); Kendal, YJ (RS, past); Veciana, B. (RS, past)

**Oregon Health & Science University:** Ahmann, A (PI); Aby-Daniel, D (Co-I); Joarder, F (Co-I); Morimoto, V (Co-I); Sprague, C (Co-I); Yamashita, D (Co-I); Cady, N (SC); Rivera-Eschright, N (SC); Kirchhoff, P (SC, past); Morales Gomez, B (RC); Adducci, J (RC, past); Goncharova, A (RC, past)

**Pacific Health Research and Education Institute/VA Pacific Islands:** Hox, SH (PI); Petrovitch, H (Co-PI); Matwichyna, M (SC); Jenkins, V (SC, past); Broadwater, L (RS); Ishii, RR (RS); Bermudez, NO (RS; past)

**Pennington Biomedical Research Center:** Hsia, DS (PI); Cefalu, WT (PI, past); Greenway, FL (Co-I); Waguespack, C (Co-I); King, E (SC); Fry, G (SC); Dragg, A (SC); Gildersleeve, B (SC); Arceneaux, J (SC); Haynes, N (SC, past); Thomassie, A (SC, past); Pavlionis, M (SC, past); Bourgeois, B (RC, past); Hazlett, C (RS)

**San Diego VA Medical Center:** Mudaliar, S (PI); Henry, R (PI, past); Boeder, S (Co-I, past); Pettus, J (Co-I, past); Diaz, E (SC); Garcia-Acosta, D (SC); Maggs, S (SC); DeLue, C (SC, past); Stallings, A (SC, past); Castro, E (RC, past); Hernandez, S (RC, past)

**Southwestern American Indian Center:** Krakoff, J (PI); Curtis, JM (Co-I); Killeen, T (SC); Khalid, M (SC); Joshevama, E (RC, past); Diaz, E (RS); Martin, D (RS); Tsingine, K (RS); Karshner, T (RS, past)

**St. Luke's-Roosevelt Hospital:** Albu, J (Co-PI); Pi-Sunyer, FX (Co-PI, past); Frances, S (Co-I); Maggio, C (SC, past); Ellis, E (RC); Bastawrose, J (RC, past); Gong, X (RS)

**SUNY Downstate Medical Center/New York Hospital-Queens:** Banerji, MA (PI); August, P (Co-I); Lee, M (Co-I); Lorber, D (Co-I); Brown, NM (SC, RC); Josephson, DH (SC); Thomas, LL (SC, RC); Tsovan, M (SC, RC); Cherian, A (SC, RC, past); Jacobson, MH (RS); Mishko, MM (RS)

**The University of North Carolina Diabetes Care Center:** Kirkman, MS (PI); Buse, JB (Co-I); Diner, J (Co-I); Dostou, J (Co-I); Machineni, S (Co-I); Young, L (Co-I); Bergamo, K (Co-I, past); Goley, A (Co-I, past); Kerr, J (Co-I, past); Largay, JF (Co-I, past); Guarda, S (SC); Cuffee, J (SC, past); Culmer, D (SC, past); Fraser, R (RC); Almeida, H (RC, past); Coffey, S (RC, past); Debnam, E (RC, past); Kiker, L (RC, past); Morton, S (RC, past); Josey, K (RS); Fuller, G (RS, past)

**University of Alabama Birmingham:** Garvey, WT (PI); Cherrington, AL (Co-PI); Dyer, D (SC); Lawson, MCR (SC); Griffith, O (SC, past); Agne, A (RC); McCullars, S (RC)

**University of Cincinnati/Cincinnati VA Medical Center:** Cohen, RM (PI); Craig, J (SC); Rogge, MC (SC, past); Burton, K (SC, past); Kersey, K (SC, RC, past); Wilson, C (SC, past); Lipp, S (RC, past); Vonder Meulen, MB (RC, past); Adkins, C (RS); Onadeko, T (RS)

**University of Colorado-Denver/VA:** Rasouli, N (PI); Baker, C (Co-I); Schroeder, E (Co-I, past); Razzaghi, M (Co-I); Lyon, C (Co-I, past); Penaloza, R (Co-I, past); Underkofler, C (SC); Lorch, R (SC); Douglass, S (SC, past); Steiner, S (SC, past)

**University of Iowa:** Sivitz, WI (PI); Cline, E (SC); Knosp, LK (SC); McConnell, J (SC, past); Lowe, T (RC)

**University of Michigan:** Herman, WH (PI); Pop-Busui, R (Co-PI); Tan, MH (Co-I); Martin, C (SC); Waltje, A (SC, RC); Katona, A (SC); Goodhall, L (SC, past); Eggleston, R (RC, past); Kuo, S (RS); Bojescu, S (RS, past); Bule, S (RS, past); Kessler, N (RS, past); LaSalle, E (RS, past); Whitley, K (RS, past)

**University of Minnesota:** Seaquist, ER (PI); Bantle, A (Co-I); Harindhanavudhi, T (Co-I); Kumar, A (Co-I); Redmon, B (Co-I); Bantle, J (Co-I, past); Coe, M (SC); Mech, M (SC); Taddese, A (RC); Lesne, L (RS); Smith, S (RS)

**University of Nebraska Medical Center/Omaha VA:** Desouza, C (PI); Kuechenmeister, L (Co-I); Shivaswamy, V (Co-I); Burbach, S (SC); Rodriguez, MG (SC); Seipel, K (SC); Alfred, A (SC, past); Morales, AL (SC, past); Eggert, J (RS); Lord, G (RS); Taylor, W (RS, past); Tillson, R (RS, past)

**University of New Mexico:** Schade, DS (PI); Adolphe, A (Co-PI); Burge, M (Co-PI, past); Duran-Valdez, E (SC); Martinez, J (RC, past); Bancroft, A (RS); Kunkel, S (RS); Ali Jamaledin Ahmad, F (RS, past); Hernandez McGinnis, D (RS, past); Pucchetti, B (RS, past); Scripsick, E (RS, past); Zamorano, A (RS, past)

**UT Health San Antonio:** DeFronzo, RA (PI); Cersosimo, E (Co-PI); Abdul-Ghani, M (Co-I); Triplitt, C (Co-I); Juarez, D (SC); Mullen, M (SC); Garza, RI (SC, past); Verastiqui, H (SC, past); Wright, K (RC, past); Puckett, C (RS)

**University of Texas-Southwestern Medical Center:** Raskin, P (PI); Rhee, C (Co-I, past); Abraham, S (SC); Jordan, LF (SC); Sao, S (SC); Morton, L (SC, past); Smith, O (SC, past); Osornio Walker, L



(RC, past); Schnurr-Breen, L (RC, past); Ayala, R (RS); Kreymer, RB (RS); Sturgess, D (RS, past)  
**VA Puget Sound Health Care System/University of Washington:** Utzschneider, KM (PI); Kahn, SE (Co-I); Alarcon-Casas Wright, L (Co-I); Boyko, EJ (Co-I); Tsai, EC (Co-I); Trence, DL (Co-I, past); Trikudanathan, S (Co-I, past); Fattaleh, BN (SC); Montgomery, BK (SC, past); Atkinson, KM (RS); Kozedub, A (RS); Concepcion, T (RS, past); Moak, C (RS, past); Prikhodko, N (RS, past); Rhothisen, S (RS, past)  
**Vanderbilt University:** Elasy, TA (PI); Martin, S (SC); Shackelford, L (RC, RS, past); Goidel, R (RS); Hinkle, N (RS); Lovell, C (RS); Myers, J (RS); Lipps Hogan, J (RS, past)  
**Washington University:** McGill, JB (PI); Salam, M (Co-I); Schweiger, T (SC, RC); Kissel, S (SC, RC, past); Recklein, C (SC, past); Clifton, MJ (RS)  
**Yale University/Fair Haven Community Health Center/West Haven VA Medical Center:** Tamborlane, W (PI); Camp, A (Co-I); Gulanski, B (Co-I); Inzucchi, SE (Co-I); Pham, K (Co-I); Alguard, M (SC, RC); Gatcomb, P (SC); Lessard, K (SC); Perez, M (SC); Iannone, L (RC); Magenheimer, E (RC); Montosa, A (RC)

## Study Units

**NIH/NIDDK (Sponsor):** Cefalu, WT (Director, Division of Diabetes, Endocrinology and Metabolic Diseases); Fradkin, J (Director, Division of Diabetes, Endocrinology and Metabolic Diseases, past); Burch, HB (Project Scientist); Bremer, AA (Project Scientist, past)

**Chairman's Office, Massachusetts General Hospital, Harvard Medical School:** Nathan, DM (Study Chair, Study Co-PI)

**Executive Committee:** Nathan, DM (Study Chair, Study Co-PI); Lachin, JM (U01 Contact PI, Study Co-PI); Buse, JB (Co-I); Kahn, SE (Co-I); Krause-Steinrauf, H (Co-I, Project Director); Larkin, ME (Co-I, SC); Tikin, M (Co-I, SC); Wexler, D (PI); Burch, HB (Program Scientist); Bremer, AA (Project Scientist, past)

**Coordinating Center, The George Washington University Biostatistics Center:** Lachin, JM (U01 Contact PI, Study Co-PI); Krause-Steinrauf, H (Co-I, Project Director); Younes, N (Co-I); Bebu, I (RS); Butera, N (RS); Buys, CJ (RS); Fagan, A (RS); Gao, Y (RS); Ghosh, A (RS); Gramzinski, MR (RS); Hall, SD (RS); Kazemi, E (RS); Legowski, E (RS); Liu, H (RS); Suratt, C (RS); Tripputi, M (RS); Arey, A (RS, past); Backman, M (RS, past); Bethupu, J (RS, past); Lund, C (RS, past); Mangat Dhaliwal, P (RS, past); McGee, P (RS, past); Mesimer, E (RS, past); Ngo, L (RS, past)

**Central Biochemical Laboratory, University of Minnesota Advanced Research and Diagnostic Laboratory:** Steffes, M (PI); Seegmiller, J (Co-I); Saenger, A (Co-I, past); Arends, V (SC); Gabrielson, D (SC, past)

**Drug Distribution Center, VA Cooperative Studies Program Clinical Research Pharmacy Coordinating Center:** Conner, T (PI); Warren, S (PI, past); Day, J (RS); Huminik, J (RS); Scrymgeour, A (RS)

**ECG Reading Center, EPICARE, Wake Forest University:** Soliman, EZ (PI); Pokharel, Y (PI, past); Zhang, ZM (Co-I, past); Campbell, C (SC); Hu, J (SC); Keasler, L (SC); Hensley, S (SC, past); Li, Y (RS)

## Economic Evaluation and Assessment Center:

**University of Michigan:** Herman, WH (PI); Kuo, S (RS); Martin, C (SC); Waltje, A (SC, RC); Mihalcea, R (RS); Min, DJ (RS); Perez-Rosas, V (RS); Prosser, L (RS); Resnicow, K (RS); Ye, W (RS)

**Centers for Disease Control and Prevention:** Shao, H (RS); Zhang, P (RS)



**Neurocognitive Coordinating Center, Columbia University Medical Center:** Luchsinger, J (PI); Sanchez, D (SC); Assuras, S (RS)

**QWB Reading Center, University of California San Diego Health Services Research Center:** Groessl, E (PI); Sakha, F (SC); Chong, H (SC, past); Hillery, N (RS)

## **Collaborators**

**Cardiovascular Adjudication Advisor:** Everett, BM (Brigham and Women's Hospital)

**Collaborating Investigators (Recruitment Sites):** Abdouch, I (University of Nebraska Medical Center/Omaha VA); Bahtiyar, G (SUNY Downstate Medical Center); Brantley, P (Pennington Biomedical Research Center (LSU)); Broyles, FE (Swedish Medical Center); Canaris, G (University of Nebraska Medical Center/Omaha VA); Copeland, P (Massachusetts General Hospital); Craine, JJ (UW Valley Medical Center); Fein, WL (Swedish Medical Center); Gliwa, A (SUNY Downstate Medical Center); Hope, L (SUNY Downstate Medical Center); Lee, MS (SUNY Downstate Medical Center); Meiners, R (Pennington Biomedical Research Center (LSU)); Meiners, V (Pennington Biomedical Research Center (LSU)); O'Neal, H (Pennington Biomedical Research Center (LSU)); Park, JE (UW Valley Medical Center); Sacerdote, A (SUNY Downstate Medical Center); Sledge, Jr., E (Pennington Biomedical Research Center (LSU)); Soni, L (SUNY Downstate Medical Center); Steppel-Reznik, J (Massachusetts General Hospital); Turchin, A (Massachusetts General Hospital)

**Beta Cell Ancillary Study:** Brooks-Worrell, B (University of Washington); Hampe, CS (University of Washington); Palmer, JP (University of Washington); Shojaie, A (University of Washington)

**Continuous Glucose Monitoring Sub-study:** Higgins, J (Massachusetts General Hospital; Harvard Medical School)

**Emotional Distress Sub-study:** Golden, S (Johns Hopkins University); Gonzalez, J (Yeshiva University; Albert Einstein College of Medicine); Naik, A (Baylor College of Medicine); Walker, E (Albert Einstein College of Medicine)

**National Diabetes Education Program (NDEP) Sub-study:** Doner Lotenberg, L (Hager Sharp); Gallivan, JM (National Institutes of Health); Lim, J (Hager Sharp); Tuncer, DM (National Institutes of Health)

**Recruitment Ancillary Study:** Behringer-Massera, S (The Mount Sinai Hospital, Beth Israel Medical Center)



## Supplemental Figure 1:

### CONSORT Diagram

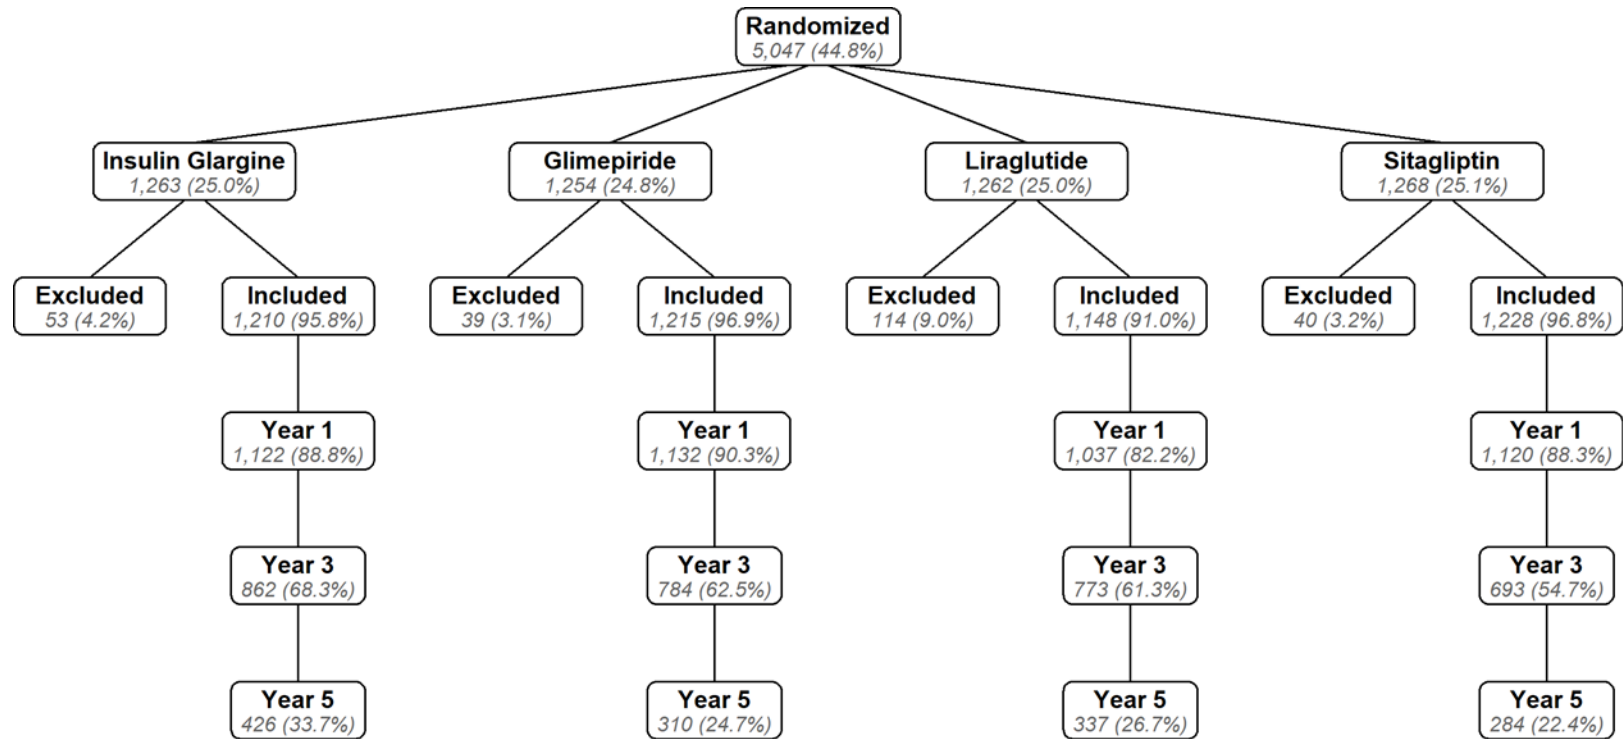



**Supplemental Table 1:**

HbA1c levels (%) in the different treatment groups at baseline and the follow-up time points.

| <b>Group</b> | <b>Year</b> | <b>N</b> | <b>HbA1c (%)</b> |
|--------------|-------------|----------|------------------|
| Glargine     | 0           | 1,210    | 7.5 (6.5, 8.5)   |
| Glimepiride  | 0           | 1,215    | 7.5 (6.5, 8.5)   |
| Liraglutide  | 0           | 1,148    | 7.5 (6.5, 8.5)   |
| Sitagliptin  | 0           | 1,228    | 7.5 (6.5, 8.5)   |
| Glargine     | 1           | 1,122    | 6.8 (5.2, 8.4)   |
| Glimepiride  | 1           | 1,132    | 6.8 (5.4, 8.2)   |
| Liraglutide  | 1           | 1,037    | 6.6 (5.0, 8.2)   |
| Sitagliptin  | 1           | 1,120    | 6.9 (5.3, 8.5)   |
| Glargine     | 3           | 862      | 6.9 (5.1, 8.7)   |
| Glimepiride  | 3           | 784      | 7.0 (5.2, 8.8)   |
| Liraglutide  | 3           | 773      | 6.8 (4.8, 8.8)   |
| Sitagliptin  | 3           | 693      | 6.8 (5.2, 8.4)   |
| Glargine     | 5           | 426      | 6.9 (4.9, 8.9)   |
| Glimepiride  | 5           | 310      | 7.0 (5.2, 8.8)   |
| Liraglutide  | 5           | 337      | 6.9 (4.9, 8.9)   |
| Sitagliptin  | 5           | 284      | 7.0 (5.2, 8.8)   |



## Supplemental Table 2:

Estimated glucose levels (mg/dL) in the different treatment groups at baseline and the follow-up time points for participants with complete OGTT profiles, based on GEE models.

| Group       | Year | N     | Fasting             | 30 minutes          | 60 minutes          | 90 minutes          | 120 minutes         |
|-------------|------|-------|---------------------|---------------------|---------------------|---------------------|---------------------|
| Glargine    | 0    | 1,120 | 152.5 (150.6,154.3) | 234.9 (232.2,237.6) | 293.4 (290.3,296.4) | 305.4 (302.3,308.5) | 286.1 (282.9,289.2) |
| Glimepiride | 0    | 1,089 | 152.1 (150.3,154.0) | 234.9 (232.0,237.7) | 294.5 (291.2,297.7) | 307.1 (303.8,310.4) | 287.0 (283.8,290.3) |
| Liraglutide | 0    | 1,071 | 152.0 (150.2,153.9) | 236.2 (233.4,239.0) | 295.7 (292.6,298.8) | 309.9 (306.7,313.0) | 290.4 (287.3,293.6) |
| Sitagliptin | 0    | 1,143 | 151.7 (150.0,153.4) | 234.9 (232.3,237.5) | 293.9 (290.8,296.9) | 305.9 (302.6,309.1) | 285.9 (282.7,289.1) |
| Glargine    | 1    | 1,019 | 120.9 (119.2,122.7) | 205.3 (202.5,208.1) | 262.7 (259.4,266.0) | 271.5 (268.1,274.9) | 248.9 (245.4,252.4) |
| Glimepiride | 1    | 1,050 | 132.2 (130.3,134.1) | 216.9 (214.1,219.8) | 275.2 (271.9,278.5) | 285.6 (282.1,289.0) | 263.2 (259.8,266.7) |
| Liraglutide | 1    | 952   | 124.9 (123.1,126.7) | 201.3 (198.2,204.3) | 257.5 (253.9,261.2) | 255.9 (252.0,259.9) | 220.3 (216.0,224.5) |
| Sitagliptin | 1    | 1,035 | 138.8 (136.9,140.8) | 218.3 (215.4,221.1) | 266.0 (262.6,269.4) | 274.7 (270.9,278.4) | 255.7 (251.8,259.6) |
| Glargine    | 3    | 784   | 122.5 (120.3,124.7) | 209.6 (206.5,212.8) | 267.4 (263.7,271.1) | 277.3 (273.4,281.2) | 255.4 (251.4,259.4) |
| Glimepiride | 3    | 709   | 135.7 (133.1,138.3) | 222.5 (218.8,226.3) | 284.0 (279.7,288.4) | 295.0 (290.6,299.5) | 274.8 (270.3,279.3) |
| Liraglutide | 3    | 714   | 131.8 (129.3,134.3) | 213.4 (209.5,217.2) | 270.3 (265.7,274.9) | 269.2 (264.5,274.0) | 234.0 (228.8,239.2) |
| Sitagliptin | 3    | 627   | 135.6 (133.2,138.0) | 215.4 (211.6,219.1) | 260.2 (255.5,264.9) | 268.1 (262.9,273.3) | 248.7 (243.4,254.1) |
| Glargine    | 5    | 363   | 125.1 (121.6,128.6) | 210.9 (206.0,215.7) | 269.0 (263.1,275.0) | 282.1 (275.7,288.5) | 263.9 (257.3,270.5) |
| Glimepiride | 5    | 260   | 133.8 (129.6,138.0) | 219.0 (213.0,225.1) | 280.0 (273.0,287.1) | 296.0 (288.5,303.5) | 277.6 (270.1,285.2) |
| Liraglutide | 5    | 281   | 131.6 (127.3,136.0) | 211.7 (204.9,218.6) | 271.2 (263.6,278.8) | 271.1 (263.0,279.3) | 235.4 (226.6,244.2) |
| Sitagliptin | 5    | 243   | 138.9 (134.9,142.8) | 214.9 (208.9,220.9) | 263.3 (255.8,270.7) | 273.7 (265.4,282.0) | 257.9 (249.7,266.2) |



### Supplemental Table 3:

Estimated C-peptide levels (nmol/L) during the OGTT in the different treatment groups at baseline and the follow-up time points for participants with complete OGTT profiles, based on GEE models.

| Group       | Year | N     | Fasting          | 30 minutes       | 60 minutes       | 90 minutes       | 120 minutes      |
|-------------|------|-------|------------------|------------------|------------------|------------------|------------------|
| Glargine    | 0    | 1,117 | 1.33 (1.30,1.36) | 1.94 (1.89,1.98) | 2.60 (2.54,2.66) | 2.98 (2.91,3.04) | 3.07 (3.00,3.14) |
| Glimepiride | 0    | 1,080 | 1.36 (1.32,1.39) | 1.95 (1.91,2.00) | 2.63 (2.57,2.69) | 3.04 (2.97,3.11) | 3.15 (3.07,3.22) |
| Liraglutide | 0    | 1,068 | 1.34 (1.31,1.38) | 1.94 (1.90,1.99) | 2.60 (2.54,2.66) | 3.01 (2.94,3.08) | 3.14 (3.07,3.21) |
| Sitagliptin | 0    | 1,132 | 1.34 (1.31,1.38) | 1.95 (1.91,2.00) | 2.62 (2.56,2.68) | 3.00 (2.94,3.07) | 3.10 (3.04,3.17) |
| Glargine    | 1    | 1,016 | 0.94 (0.92,0.97) | 1.66 (1.61,1.70) | 2.40 (2.34,2.46) | 2.84 (2.77,2.91) | 2.97 (2.89,3.04) |
| Glimepiride | 1    | 1,045 | 1.40 (1.37,1.44) | 2.07 (2.02,2.11) | 2.78 (2.72,2.84) | 3.22 (3.15,3.29) | 3.39 (3.31,3.47) |
| Liraglutide | 1    | 949   | 1.34 (1.31,1.38) | 2.06 (2.01,2.11) | 3.22 (3.13,3.30) | 4.12 (4.00,4.23) | 4.49 (4.37,4.62) |
| Sitagliptin | 1    | 1,032 | 1.29 (1.26,1.33) | 2.05 (1.99,2.10) | 2.86 (2.79,2.93) | 3.33 (3.25,3.40) | 3.44 (3.36,3.52) |
| Glargine    | 3    | 773   | 0.87 (0.84,0.90) | 1.52 (1.47,1.56) | 2.20 (2.14,2.27) | 2.60 (2.53,2.67) | 2.72 (2.64,2.80) |
| Glimepiride | 3    | 699   | 1.31 (1.27,1.35) | 1.91 (1.85,1.96) | 2.55 (2.48,2.62) | 2.92 (2.84,3.01) | 3.05 (2.97,3.14) |
| Liraglutide | 3    | 705   | 1.27 (1.23,1.31) | 1.94 (1.89,2.00) | 2.94 (2.85,3.03) | 3.74 (3.63,3.86) | 3.99 (3.87,4.12) |
| Sitagliptin | 3    | 616   | 1.21 (1.17,1.25) | 1.98 (1.91,2.04) | 2.74 (2.66,2.83) | 3.20 (3.10,3.29) | 3.30 (3.21,3.40) |
| Glargine    | 5    | 357   | 0.82 (0.78,0.87) | 1.46 (1.39,1.53) | 2.09 (1.99,2.19) | 2.46 (2.35,2.57) | 2.56 (2.45,2.68) |
| Glimepiride | 5    | 253   | 1.25 (1.19,1.31) | 1.80 (1.72,1.89) | 2.41 (2.30,2.52) | 2.79 (2.66,2.91) | 2.90 (2.77,3.02) |
| Liraglutide | 5    | 278   | 1.23 (1.17,1.29) | 1.87 (1.77,1.96) | 2.92 (2.78,3.07) | 3.69 (3.51,3.88) | 3.99 (3.79,4.19) |
| Sitagliptin | 5    | 237   | 1.15 (1.08,1.22) | 1.81 (1.72,1.90) | 2.54 (2.41,2.67) | 3.02 (2.87,3.18) | 3.20 (3.04,3.36) |



**Supplemental Table 4:**

Estimated HOMA2-%S in the different treatment groups at baseline and the follow-up time points for participants with complete OGTT profiles, based on GEE models.

| Year | Group       | N     | Mean (95% CI)        | p vs. Glim | p vs. Lira | p vs. Sita |
|------|-------------|-------|----------------------|------------|------------|------------|
| 0    | Glargine    | 1,210 | 34.39 (34.34, 34.44) |            |            |            |
|      | Glimepiride | 1,215 | 34.41 (34.36, 34.46) |            |            |            |
|      | Liraglutide | 1,147 | 34.40 (34.35, 34.46) |            |            |            |
|      | Sitagliptin | 1,228 | 34.41 (34.37, 34.46) |            |            |            |
| 1    | Glargine    | 1,122 | 57.71 (56.06, 59.37) | <0.001     | <0.001     | <0.001     |
|      | Glimepiride | 1,132 | 34.46 (33.84, 35.08) |            |            |            |
|      | Liraglutide | 1,036 | 37.27 (36.54, 38.01) |            | <0.001     | 0.751      |
|      | Sitagliptin | 1,120 | 37.00 (36.27, 37.72) |            |            |            |
| 3    | Glargine    | 862   | 62.36 (60.21, 64.51) | <0.001     | <0.001     | <0.001     |
|      | Glimepiride | 784   | 35.58 (34.78, 36.38) |            |            |            |
|      | Liraglutide | 772   | 37.83 (36.97, 38.69) |            | <0.001     | 0.606      |
|      | Sitagliptin | 693   | 38.39 (37.39, 39.38) |            |            |            |
| 5    | Glargine    | 425   | 65.18 (61.80, 68.56) | <0.001     | <0.001     | <0.001     |
|      | Glimepiride | 310   | 36.21 (34.99, 37.43) |            |            |            |
|      | Liraglutide | 337   | 38.84 (37.54, 40.15) |            | 0.007      | 0.009      |
|      | Sitagliptin | 284   | 38.98 (37.45, 40.51) |            |            |            |



**Supplemental Table 5:**

Estimated HOMA2-%B in the different treatment groups at baseline and the follow-up time points for participants with complete OGTT profiles, based on GEE models.

| Year | Group       | N     | Mean (95% CI)           | p vs. Glim | p vs. Lira | p vs. Sita |
|------|-------------|-------|-------------------------|------------|------------|------------|
| 0    | Glargine    | 1,210 | 85.69 (85.41, 85.98)    |            |            |            |
|      | Glimepiride | 1,215 | 85.89 (85.59, 86.19)    |            |            |            |
|      | Liraglutide | 1,147 | 85.86 (85.57, 86.14)    |            |            |            |
|      | Sitagliptin | 1,228 | 85.92 (85.62, 86.21)    |            |            |            |
| 1    | Glargine    | 1,122 | 95.76 (94.16, 97.36)    | <0.001     | <0.001     | 0.199      |
|      | Glimepiride | 1,132 | 115.73 (113.16, 118.31) |            |            |            |
|      | Liraglutide | 1,036 | 120.81 (118.60, 123.02) |            |            |            |
|      | Sitagliptin | 1,120 | 97.56 (95.90, 99.22)    |            |            |            |
| 3    | Glargine    | 862   | 89.86 (88.03, 91.69)    | <0.001     | <0.001     | 0.035      |
|      | Glimepiride | 784   | 105.50 (102.36, 108.63) |            |            |            |
|      | Liraglutide | 772   | 105.77 (103.14, 108.40) |            |            |            |
|      | Sitagliptin | 693   | 93.28 (91.04, 95.52)    |            |            |            |
| 5    | Glargine    | 425   | 85.36 (83.00, 87.72)    | <0.001     | <0.001     | 0.456      |
|      | Glimepiride | 310   | 103.52 (98.53, 108.52)  |            |            |            |
|      | Liraglutide | 337   | 103.63 (99.90, 107.36)  |            |            |            |
|      | Sitagliptin | 284   | 87.51 (83.95, 91.07)    |            |            |            |



**Supplemental Table 6:**

Estimated C-peptide index [(nmol/L)/(mg/dL)\*100] in the different treatment groups at baseline and the follow-up time points for participants with complete OGTT profiles, based on GEE models.

| Year | Group       | N     | Mean (95% CI)     | p vs. Glim | p vs. Lira | p vs. Sita |
|------|-------------|-------|-------------------|------------|------------|------------|
| 0    | Glargine    | 1,145 | 0.77 (0.76, 0.78) |            |            |            |
|      | Glimepiride | 1,116 | 0.76 (0.75, 0.77) |            |            |            |
|      | Liraglutide | 1,092 | 0.76 (0.75, 0.77) |            |            |            |
|      | Sitagliptin | 1,166 | 0.77 (0.76, 0.78) |            |            |            |
| 1    | Glargine    | 996   | 0.89 (0.85, 0.92) | 0.223      | <0.001     | <0.001     |
|      | Glimepiride | 1,005 | 0.85 (0.82, 0.89) |            |            |            |
|      | Liraglutide | 942   | 1.03 (0.99, 1.08) |            |            |            |
|      | Sitagliptin | 1,022 | 1.00 (0.97, 1.04) |            |            |            |
| 3    | Glargine    | 765   | 0.75 (0.72, 0.79) | 0.262      | <0.001     | <0.001     |
|      | Glimepiride | 662   | 0.72 (0.68, 0.76) |            |            |            |
|      | Liraglutide | 698   | 0.87 (0.82, 0.92) |            |            |            |
|      | Sitagliptin | 609   | 0.96 (0.91, 1.01) |            |            |            |
| 5    | Glargine    | 347   | 0.74 (0.69, 0.79) | 0.026      | 0.201      | 0.012      |
|      | Glimepiride | 245   | 0.64 (0.59, 0.70) |            |            |            |
|      | Liraglutide | 269   | 0.80 (0.74, 0.87) |            |            |            |
|      | Sitagliptin | 237   | 0.87 (0.79, 0.95) |            |            |            |



**Supplemental Table 7:**

Estimated total C-peptide response [Incremental mean AUC C-peptide/Glucose (nmol/L)/(mg/dL)\*100] in the different treatment groups at baseline and the follow-up time points for participants with complete OGTT profiles, based on GEE models.

| Year | Group       | N     | Mean (95% CI)     | p vs. Glim | p vs. Lira | p vs. Sita |
|------|-------------|-------|-------------------|------------|------------|------------|
| 0    | Glargine    | 1,115 | 1.05 (1.05, 1.06) |            |            |            |
|      | Glimepiride | 1,079 | 1.05 (1.05, 1.06) |            |            |            |
|      | Liraglutide | 1,065 | 1.05 (1.04, 1.05) |            |            |            |
|      | Sitagliptin | 1,131 | 1.05 (1.05, 1.06) |            |            |            |
| 1    | Glargine    | 954   | 1.24 (1.20, 1.27) | 0.024      | <0.001     | <0.001     |
|      | Glimepiride | 952   | 1.17 (1.13, 1.21) |            | <0.001     | <0.001     |
|      | Liraglutide | 900   | 1.99 (1.92, 2.05) |            |            | <0.001     |
|      | Sitagliptin | 974   | 1.50 (1.45, 1.55) |            |            |            |
| 3    | Glargine    | 727   | 1.06 (1.02, 1.10) | 0.005      | <0.001     | <0.001     |
|      | Glimepiride | 630   | 0.97 (0.92, 1.01) |            | <0.001     | <0.001     |
|      | Liraglutide | 661   | 1.62 (1.55, 1.69) |            |            | 0.002      |
|      | Sitagliptin | 584   | 1.45 (1.38, 1.52) |            |            |            |
| 5    | Glargine    | 330   | 1.02 (0.96, 1.08) | 0.003      | <0.001     | <0.001     |
|      | Glimepiride | 221   | 0.87 (0.81, 0.94) |            | <0.001     | <0.001     |
|      | Liraglutide | 256   | 1.54 (1.44, 1.64) |            |            | <0.001     |
|      | Sitagliptin | 222   | 1.25 (1.15, 1.34) |            |            |            |



## Supplemental Figure 2:

Effects of the four different glucose-lowering medications on HOMA2-%B in participants on their assigned dual therapy at year 1 (A), year 3 (B) and year 5 (C).

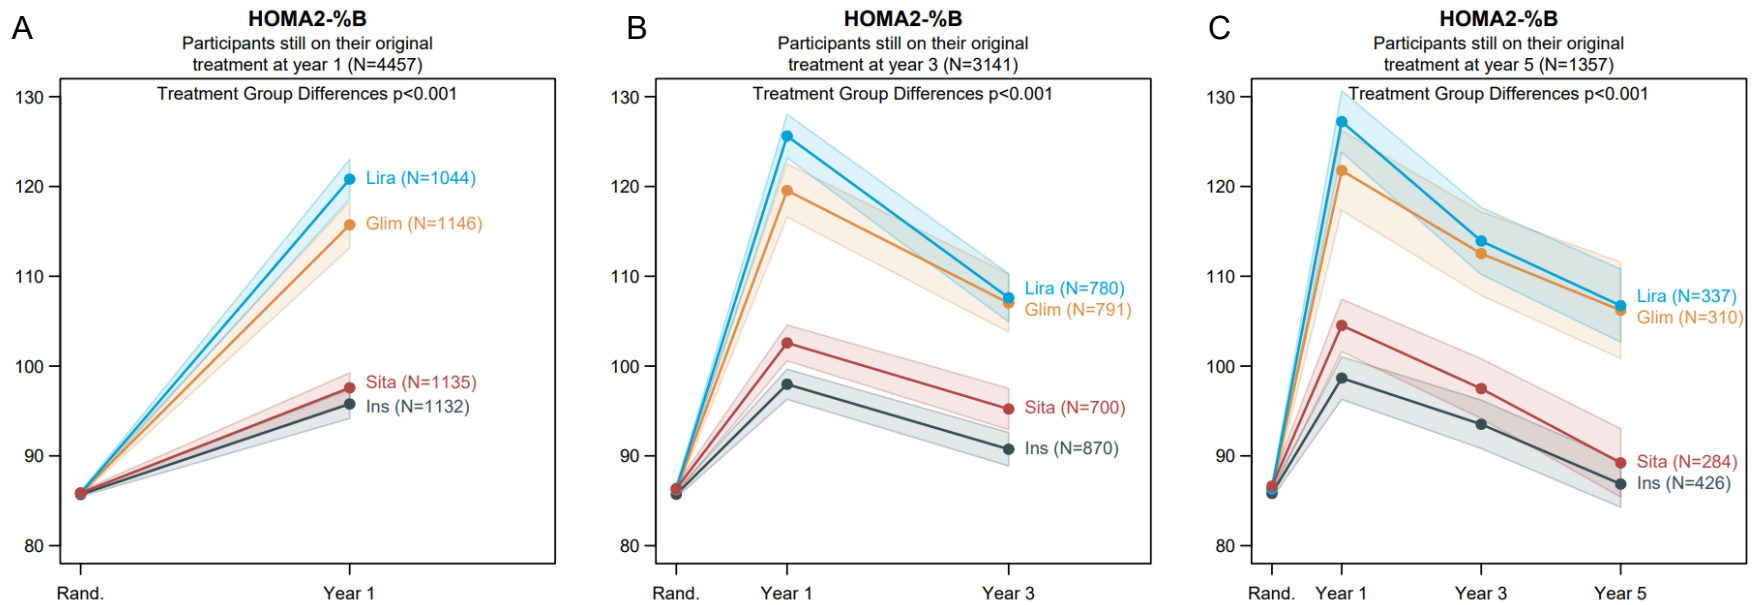



### Supplemental Figure 3:

Effects of the four different glucose-lowering medications on CPI in participants on their originally assigned dual therapy at year 1 (A), year 3 (B) and year 5 (C).

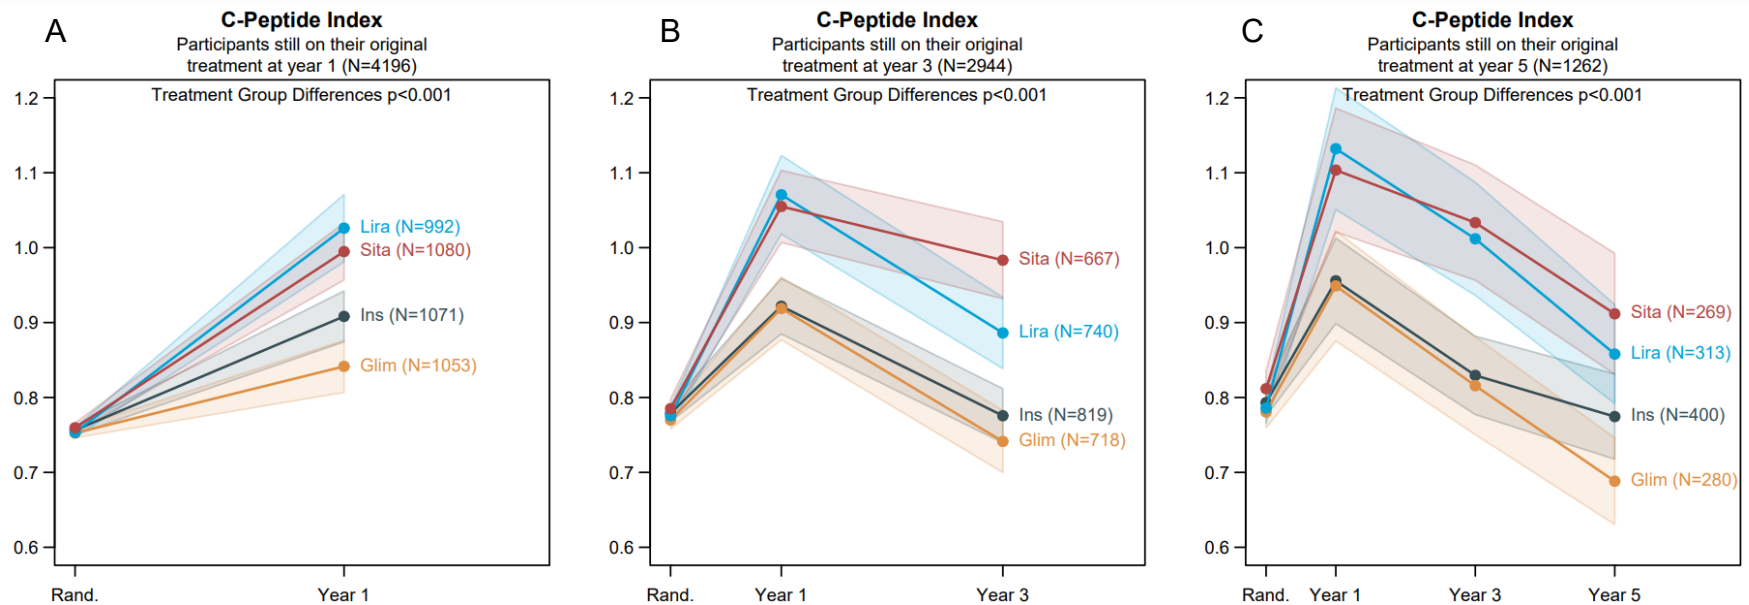



## Supplemental Figure 4:

Effects of the four different glucose-lowering medications on total C-peptide response in participants on their originally assigned dual therapy at year 1 (A), year 3 (B) and year 5 (C).

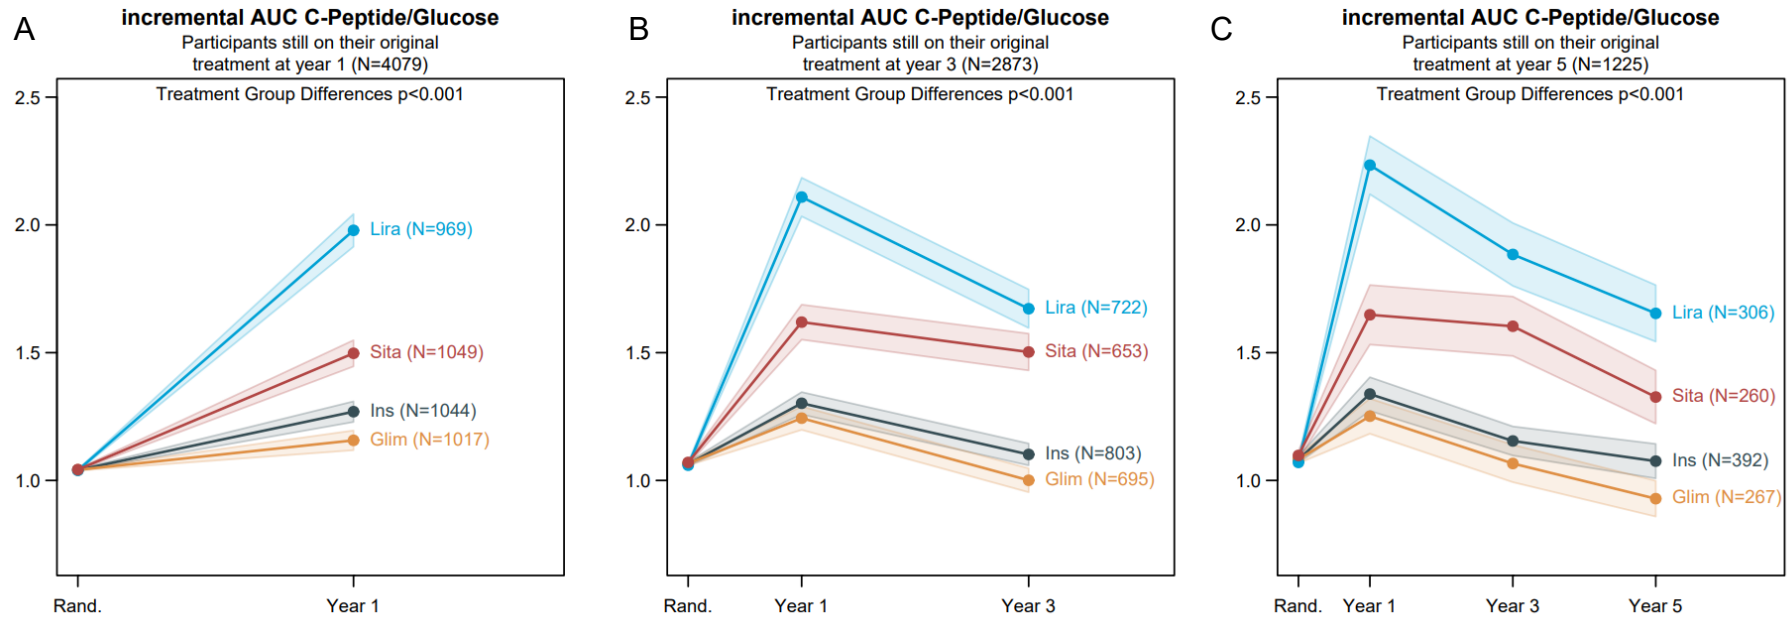

Supplement: Supplementary file 1 [file 1]
